# Supplementary material for: Macrophages expressing macrophage receptor with collagen structure attenuate liver fibrosis through a tissue restoration phenotype
Source: JCI journal article supplement (doi:10.1172/jci.insight.193172), 2026-03-23
Supplement: sd1 [file 1]

# **Macrophages expressing Macrophage Receptor with Collagen Structure Attenuate Liver Fibrosis Through a Tissue Restoration Phenotype**

## **Supplemental Material**

### **Methods**

#### ***RAW 264.7 Macrophage Transfection and Migration Assay***

The RAW 264.7 macrophage-like cell line (TIB-71, ATCC) was used for in vitro Marco expression experiments. RAW 264.7 cells were maintained at 37 °C and 5% CO<sub>2</sub> in culture with Dulbecco modified eagle medium (11995-065; Gibco) supplemented with 10% FBS, 1% penicillin/streptomycin, and 10 mM HEPES (15630080, GIBCO). Cells were grown to a confluence of 60% to 70% and transfected with the pCMV3-C-GFPSpark Mouse Marco expression plasmid (MG50283-ACG; Sino Biological, Inc) or empty plasmid using FuGENE 4k (4k-1000; Fugene LLC) transfection reagent. After 24 hours, the transfected cells were seeded as a monolayer in a 35-mm tissue culture dish. A scratch was made in the cell monolayer by dragging a 10- $\mu$ L pipette tip across the well bottom. Immediately after performing the scratch, the culture medium was replaced with fresh medium containing PBS as the vehicle or 10 ng/mL C-X-C motif chemokine ligand 9 (CXCL9) (578202, BioLegend) as a stimulant. Cells were imaged using Zeiss Axio-Observer 7 inverted microscope with live cell imaging over a 12-hour period using Zen software to track all the GFP+ cells and GFP- cells. The rate of cell migration was calculated by subtracting the scratch area after 12 hours from the scratch area at 0 hours and dividing the difference by the scratch area at 0 hours. The individual points in the graph represent individual cells. (27)

### ***Reverse Transcription qPCR***

We extracted mRNA from RAW 264.7 cells, bone marrow cells, and mouse liver with the RNeasy Mini Kit (74104; Qiagen). Total RNA (500 ng) was reverse transcribed with the SuperScript III First-Strand Synthesis System (18080-051; Invitrogen), and qPCR was performed with the iTaq Universal SYBR Green Supermix (1725120; Bio-Rad Laboratories, Inc) according to the manufacturer protocol. The primers used and sequences are listed in Supplemental Table 1.

### ***Immunoblot Analysis***

Liver tissues and BMDMs were lysed in RIPA lysis buffer (89900; Thermo Fisher Scientific) supplemented with protease inhibitors (11836170001; Roche). Protein concentrations were quantified with the Dc protein assay (5000116; Bio-Rad Laboratories, Inc). For each sample, 30 µg of total protein was loaded onto a polyacrylamide gel, subjected to electrophoresis with sodium dodecyl sulfate, and transferred to a nitrocellulose membrane. Membranes were blocked in 5% milk and incubated overnight with primary antibodies at 4 °C. Primary antibodies and dilutions are listed in Supplemental Table 2. Enhanced chemiluminescence (WBLUR0100; Millipore or sc-2048; Santa Cruz Biotechnology) was used for protein detection and immunoblots were visualized with a biomolecular imager (Azure Biosystems). Proteins were quantified with ImageJ software (26).

### ***In vitro Phagocytosis Assay***

Sorted MARCO-positive or MARCO-negative BMDMs were plated in 96-well plates at a density of 5,000 cells/well in 150 mL of RPMI supplemented with 10% FBS and incubated overnight at 37 °C in 5% CO<sub>2</sub>. The next day, the culture medium was removed, and the cells were incubated

in fresh RPMI with 1:200 fluorescein isothiocyanate–labeled rabbit immunoglobulin G–coated latex beads (500290; Cayman Chemical) for 2 hours at 37 °C. The cells were then washed, and fluorescence was measured with a GloMax microplate reader (Promega Corporation).

### ***Immunostaining***

Formalin fix-paraffin embedded 5- $\mu$ m tissue sections of human liver from donors and from cirrhosis patients were obtained through the Mayo Center for Cell Signaling in Gastroenterology from samples collected at Mayo Clinic. Mouse livers from either the olive oil group or CCl<sub>4</sub> group mice were fixed in 10% formalin, embedded in paraffin, and sectioned into 5- $\mu$ m sections.

Sections were deparaffinized, and heat-mediated antigen retrieval was performed in Tris-EDTA buffer (10mM Tris-base, 1mM EDTA, and 0.05% Tween 20; pH, 9.0). Sections were blocked in 10% FBS and 1% BSA for 1 hour at room temperature, followed by overnight incubation with primary antibodies. Primary antibodies and dilutions are listed in Supplemental Table 2.

For immunohistochemical analysis, slides were incubated with an appropriate biotinylated secondary antibody (Vector Laboratories Inc) for 1 hour at room temperature. The slides were then incubated with horseradish peroxidase–conjugated avidin reagent (PK-7100; Vector Laboratories Inc) for 30 minutes at room temperature. The slides were developed with 3,3'-diaminobenzidin substrate (SK-4100; Vector Laboratories Inc) for 3 minutes. Before mounting, the stained slides were counterstained with hematoxylin and dehydrated in ethanol and xylene.

For immunofluorescence staining, the slides were incubated with fluorophore-conjugated secondary antibodies for 1 hour and counterstained with DAPI for 3 minutes before mounting with antifade media. Images were acquired with a light microscope (ZEISS Microscopy), Evos Cell

Imaging System (Thermo Fisher Scientific), or LSM 780 laser scanning confocal microscope (ZEISS Microscopy).

### ***Fluorescence-Activated Cell Sorting (FACS)***

Cells were resuspended in FACS buffer (1% FBS, 0.1% BSA, and 2 mM EDTA in 1X PBS) and incubated with TruStain FcX PLUS (156604; BioLegend) to decrease nonspecific staining followed with conjugated primary antibodies (Supplemental Table 2). Sorting and data acquisition were performed with a FACSAria II SORP instrument and FACSDiva software, v8.0.1 (BD Biosciences). Sorting was based on manual gating. The results were analyzed with FlowJo software, v10.10.0 (FlowJo, LLC).

### ***Mass cytometry by Time-of-flight (CyTOF)***

Intrahepatic leukocytes were isolated as described in the single cell RNA seq methodology section. 3 million cells were fixed and stained with a macrophage focused antibody cocktail (Supplementary Table 3) conjugated to lanthanide-based metal isotopes according to manufacturer guidelines (Fluidigm, San Francisco, CA). Mass cytometry was performed at the Mayo Clinic Immune Monitoring Core (Mayo Clinic, Rochester, MN) on a Helios mass cytometry system (Fluidigm, San Francisco, CA). Signal normalization was achieved by spiking EQ™ four element calibration beads (Cat. No. 201078, Fluidigm, San Francisco, CA) into each sample. Data normalization was performed using CyTOF software version 6.7.1014 (Fluidigm). FlowJo Software (version 10.8.1; Becton, Dickinson & Company) was used to identify cell singlets ( $^{191}\text{Ir}^{+193}\text{Ir}^{+}$ ) and viable events ( $^{195}\text{Pt}^{-}$ ) before performing high dimensional data analysis. All live

singlet events were exported to new “.fcs” (flow cytometry standard) files prior to analysis. t-SNE clustering analysis was performed on 10,000 equivalent events from each sample with selection of all parameters. Cellular phenotypes were assigned to the t-SNE plot based on distribution and expression characteristics of all markers after clustering. Phenographs were generated in the R language-based Cytokit software<sup>1</sup>.

### ***Hydroxyproline Content Measurement***

Hydroxyproline content was quantified using a colorimetric assay test kit (#MAK569, Millipore-Sigma) following manufacturer instructions. 10 mg of liver tissue were homogenized in 100  $\mu$ L of ultrapure water. 100  $\mu$ L of pure Hydrochloric Acid were added to the homogenized tissue and were incubated for hydrolyzation at 120 degrees Celsius for 3 hours. Later, 50  $\mu$ L of hydrolyzed material were dried at 60 degrees Celsius overnight. The dry material was resuspended in 100  $\mu$ L of Chloramine T/Oxidation Buffer followed by addition of 100  $\mu$ L of DMAB Reagent in perchloric acid. After 90 minutes incubation at 60°C, the absorbance was measured at 560 nm. Hydroxyproline concentration was quantified with a standard curve using a hydroxyproline standard provided by in the kit.

## Supplemental Tables

**Supplemental Table 1. Antibodies used in the study**

| Target     | Species reactivity | Conjugation        | Dilution         | Technique      | Catalog #   | Clone         | Company                         |
|------------|--------------------|--------------------|------------------|----------------|-------------|---------------|---------------------------------|
| CD68       | Human              | None               | 1:100            | IF, IHC        | Ab213363    | EPR20545      | Abcam                           |
| CD68       | Human              | None               | 1:100            | IF             | MAB20401    | 298807        | Bio-Techne                      |
| CD68       | Mouse              | None               | 1:200,<br>1:1000 | IF, IHC,<br>WB | Ab125212    | Polyclonal    | Abcam                           |
| CD68       | Mouse              | None               | 1:100            | IF             | Ab201340    | C68/684       | Abcam                           |
| CD11b      | Mouse              | VioGreen           | 1:200            | FC             | 130-113-811 | M1/70.15.11.5 | Miltenyi                        |
| CD45       | Mouse              | VioBlue            | 1:200            | FC             | 130-110-802 | 30F11         | Miltenyi                        |
| CLEC4f     | Mouse              | None               | 1:100            | IF, IHC        | AF2784      | Polyclonal    | Bio-Techne                      |
| Collagen I | Human,<br>Mouse    | None               | 1:200            | IF, WB         | 1310-01     | Polyclonal    | Southern<br>Biotechnologies     |
| F4/80      | Mouse              | APC                | 1:100            | FC             | 123116      | BM8           | BioLegend                       |
| F4/80      | Mouse              | PerCP-<br>Vio700   | 1:200            | FC             | 130-118-466 | BM8           | Miltenyi                        |
| F4/80      | Mouse              | None               | 1:200            | IF             | 70076s      | D2S9R         | Cell Signaling<br>Technologies  |
| GFP        | N/A                | None               | 1:100            | IF             | 55494S      | 5G4           | Cell Signalling<br>Technologies |
| MARCO      | Human              | None               | 1:100            | IF, IHC        | PA5-64134   | Polyclonal    | Invitrogen                      |
| MARCO      | Mouse              | PE                 | 2 ug/mL          | FC             | FAB29561P   | 2359A         | Novus<br>Biologicals            |
| MARCO      | Mouse              | None               | 1:200            | IF             | AF2956      | Polyclonal    | Bio-Techne                      |
| MARCO      | Mouse              | None               | 1:100<br>1:1000  | IF, IHC,<br>WB | ab239369    | EPR22944-64   | Abcam                           |
| IBA1       | Mouse              | Alexa Fluor<br>647 | 1:200            | IF             | 78060       | E4O4W         | Cell Signaling<br>Technologies  |
| DESMIN     | Mouse              | None               | 1:50             | IF             | 14-9747-82  | DE-U-10       | Invitrogen                      |
| GAPDH      | Mouse              | None               | 1:5000           | WB             | MA5-15738   | GA1R          | Invitrogen                      |
| IgG        | Goat               | Alexa fluor<br>594 | 1:300            | IF             | A11058      | Polyclonal    | Invitrogen                      |

|     |        |                    |       |    |        |            |            |
|-----|--------|--------------------|-------|----|--------|------------|------------|
| IgG | Goat   | Alexa fluor<br>488 | 1:300 | IF | A11055 | Polyclonal | Invitrogen |
| IgG | Goat   | Alexa fluor<br>568 | 1:300 | IF | A11057 | Polyclonal | Invitrogen |
| IgG | Goat   | Alexa fluor<br>647 | 1:300 | IF | A21447 | Polyclonal | Invitrogen |
| IgG | Mouse  | Alexa fluor<br>488 | 1:300 | IF | A21202 | Polyclonal | Invitrogen |
| IgG | Mouse  | Alexa fluor<br>568 | 1:300 | IF | A10037 | Polyclonal | Invitrogen |
| IgG | Mouse  | Alexa fluor<br>647 | 1:300 | IF | A31571 | Polyclonal | Invitrogen |
| IgG | Rabbit | Alexa fluor<br>488 | 1:300 | IF | A21206 | Polyclonal | Invitrogen |
| IgG | Rabbit | Alexa fluor<br>568 | 1:300 | IF | A10040 | Polyclonal | Invitrogen |
| IgG | Rabbit | Alexa fluor<br>647 | 1:300 | IF | A31573 | Polyclonal | Invitrogen |
| IgG | Rat    | Alexa fluor<br>647 | 1:300 | IF | A21208 | Polyclonal | Invitrogen |

---

---

**Supplemental Table 2. Mouse qPCR primer sequences**

---

| <b>Gene</b> | <b>Forward sequence</b>  | <b>Reverse sequence</b> |
|-------------|--------------------------|-------------------------|
| MMP9        | CCGACTTTTGTGGTCTTCCCC    | CTCTCCCATCATCTGGGCGG    |
| MMP12       | AGCTGCACTCTGCTGAAAGG     | AGCCCCACAGGCAGATACC     |
| CCL5        | CCTGCTGCTTTGCCTACCTC     | CACACACTTGGCGGTTTCCTT   |
| TNF         | CCACGTCGTAGCAAACCAA      | GACAAGGTACAACCCATCGGC   |
| ACTB        | CCTCCCTGGAGAAGAGCTATG    | TTACGGATGTCAACGTCACAC   |
| MARCO       | CTTCTGTTCGCATGCTCGGTT    | AGATGTTCCCAGAGCCACCT    |
| IL10        | GTGGAGCAGGTGAAGAGTGA     | TCGGAGAGAGGTACAAACGAG   |
| CXCR3       | AGCCATGTACCTTGAGGTTAGTGA | CAGGCTGAAATCCTGTGGGC    |
| MMP3        | TATACGAGGGCACGAGGAGC     | TCTTCACGGTTGCAGGGAGA    |
| MMP2        | GGACAAGTGGTCCGCGTAAA     | CCGACCGTTGAACAGGAAGG    |

---

**Supplemental Table 3. Mouse Macrophage Antibody Panel for CyTOF**

| <b>Target</b>   | <b>Label</b> | <b>Clone</b> | <b>Localization</b> |
|-----------------|--------------|--------------|---------------------|
| CD45            | 089Y         | 30-F11       | Surface             |
| CD44            | 106Cd        | IM7          | Surface             |
| CD38            | 110Cd        | 90           | Surface             |
| CD169/Siglec-1  | 112Cd        | QA20A47      | Surface             |
| MARCO           | 114Cd        | 2359A        | Surface             |
| CD36            | 116Cd        | HM36         | Surface             |
| Lgals3          | 141Pr        | 202213       | Surface             |
| CD204           | 143Nd        | 1F8C33       | Surface             |
| MHC Class I     | 144Nd        | 28-14-8      | Surface             |
| CD69            | 145Nd        | H1.2F3       | Surface             |
| PD-L1           | 146Nd        | 10F.9G2      | Surface             |
| CD9             | 147Sm        | MZ3          | Surface             |
| CD80            | 148Nd        | 16-10A1      | Surface             |
| Tim4            | 149Sm        | 370901       | Surface             |
| I-A/I-E         | 150Nd        | M5/114.15.2  | Surface             |
| CD206 (MMR)     | 151Eu        | C068C2       | Surface             |
| CLEC4F/CLECSF13 | 153Eu        | poly Goat    | Surface             |
| CD16/CD32       | 154Sm        | 93           | Surface             |
| MERTK           | 155Gd        | 108928       | Surface             |

|               |       |               |         |
|---------------|-------|---------------|---------|
| CCR2          | 156Gd | 475301        | Surface |
| CD86          | 158Gd | GL1           | Surface |
| F4/80         | 159Tb | BM8           | Surface |
| CD64          | 160Gd | 290322        | Surface |
| Ly6G          | 161Dy | 1A8           | Surface |
| CCR5          | 163Dy | 225307        | Surface |
| CX3CR1        | 164Dy | SA011F11      | Surface |
| CD14          | 165Ho | Sa14-2        | Surface |
| CD19          | 166Er | 6D5           | Surface |
| TREM2         | 167Er | 237920        | Surface |
| CD8a          | 168Er | 53-6.7        | Surface |
| TRAIL         | 169Tm | N2B2          | Surface |
| CD11b (Mac-1) | 172Yb | M1/70         | Surface |
| VSIG4         | 173Yb | poly Goat IgG | Surface |
| CD115/CSF1R   | 174Yb | AFS98         | Surface |
| Ly6C          | 175Lu | HK1.4         | Surface |
| CD45R (B220)  | 176Yb | RA3-6B2       | Surface |
| CD3e          | 196Pt | 145-2C11      | Surface |
| CD11c         | 209Bi | N/A           | Surface |

---

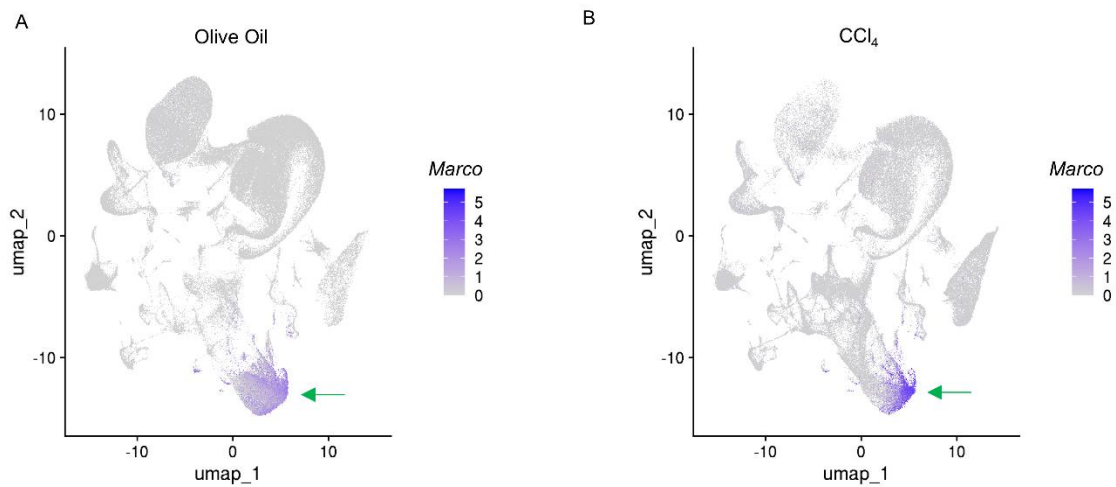

**Supplemental Figure 1. Feature Plots of *Marco* Expression between Macrophages derived from CCl<sub>4</sub>-induced chronic fibrosis and Olive Oil Controls.** Feature plots split by group to highlight that while endogenous expression of *Marco* is low in the healthy olive oil administered liver (A), it is detectable by scRNAseq and shown to clearly increase with CCl<sub>4</sub> chronic fibrotic injury (B).

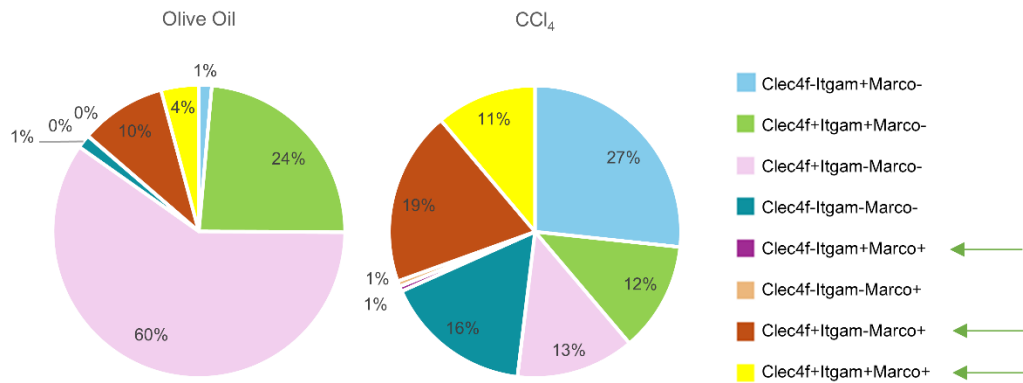

**Supplemental Figure 2. Bioinformatic Sorting Demonstrates Cell Subset Changes in chronic CCl<sub>4</sub> -induced fibrosis and populations of *Marco*-positive, *Clec4f*-negative cells.** Proportions of total macrophages positive for transcripts of cell markers *Clec4f* (Kupffer cells), *Itgam* (infiltrating macrophages), and *Marco* are shown with green arrows. The compartment of cells positive for *Marco* expands substantially with CCl<sub>4</sub>-induced fibrosis.

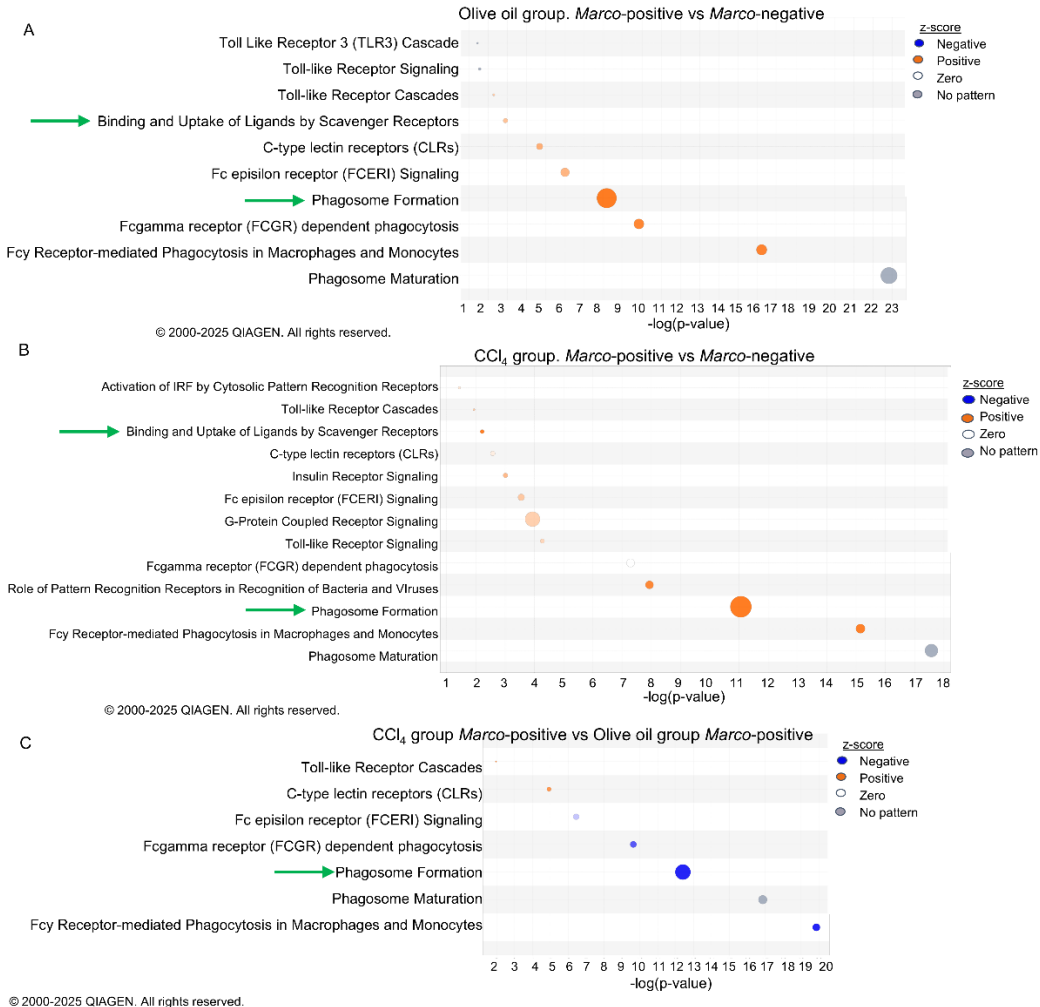

**Supplemental Figure 3. Potential Phagocytic Differences between *Marco*-positive cells derived from Healthy Olive Oil vs CCl<sub>4</sub> injured murine livers by IPA of scRNAseq. (A)** IPA of *Marco*-positive versus *Marco*-negative macrophages from the healthy olive oil control murine liver highlights upregulation of phagosome formation pathways (green arrow) indicating potential increases in phagocytosis. **(B)** IPA of *Marco*-positive versus *Marco*-negative macrophages from CCl<sub>4</sub> injured murine liver. **(C)** IPA of *Marco*-positive macrophages from CCl<sub>4</sub> injured murine liver versus healthy liver. Notably, downregulated pathways show features impaired in *Marco*-positive macrophages induced in an injury microenvironment versus endogenous *Marco*-positive macrophages in healthy liver. Results are filtered to phagocytosis relevant pathways.

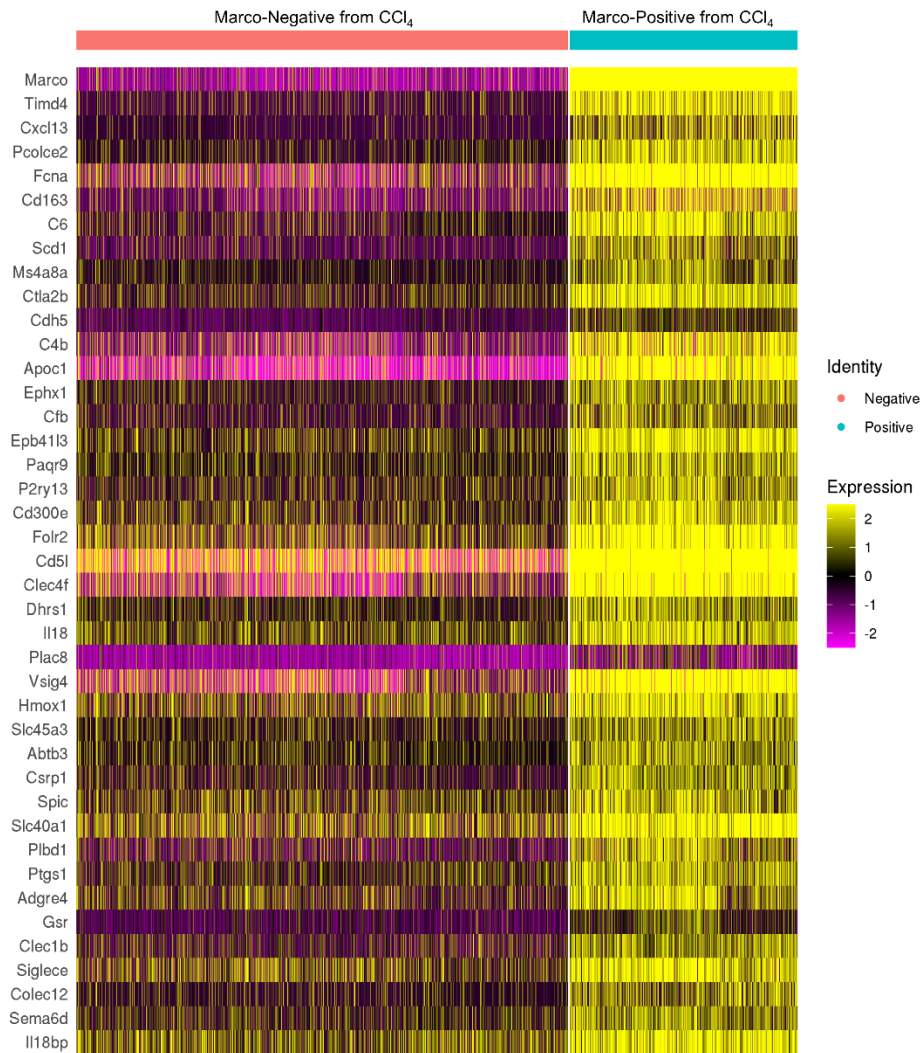

**Supplemental Figure 4. Heatmap of top differentially expressed genes between *Marco*-positive vs *Marco*-negative macrophages within CCl<sub>4</sub>-injured livers.** Macrophages were bioinformatically sorted and differential gene expression run for *Marco*-positive versus *Marco*-negative macrophages solely within the CCl<sub>4</sub> injured liver sample to isolate specific changes within *Marco*-positive cells from the fibrotic microenvironment.

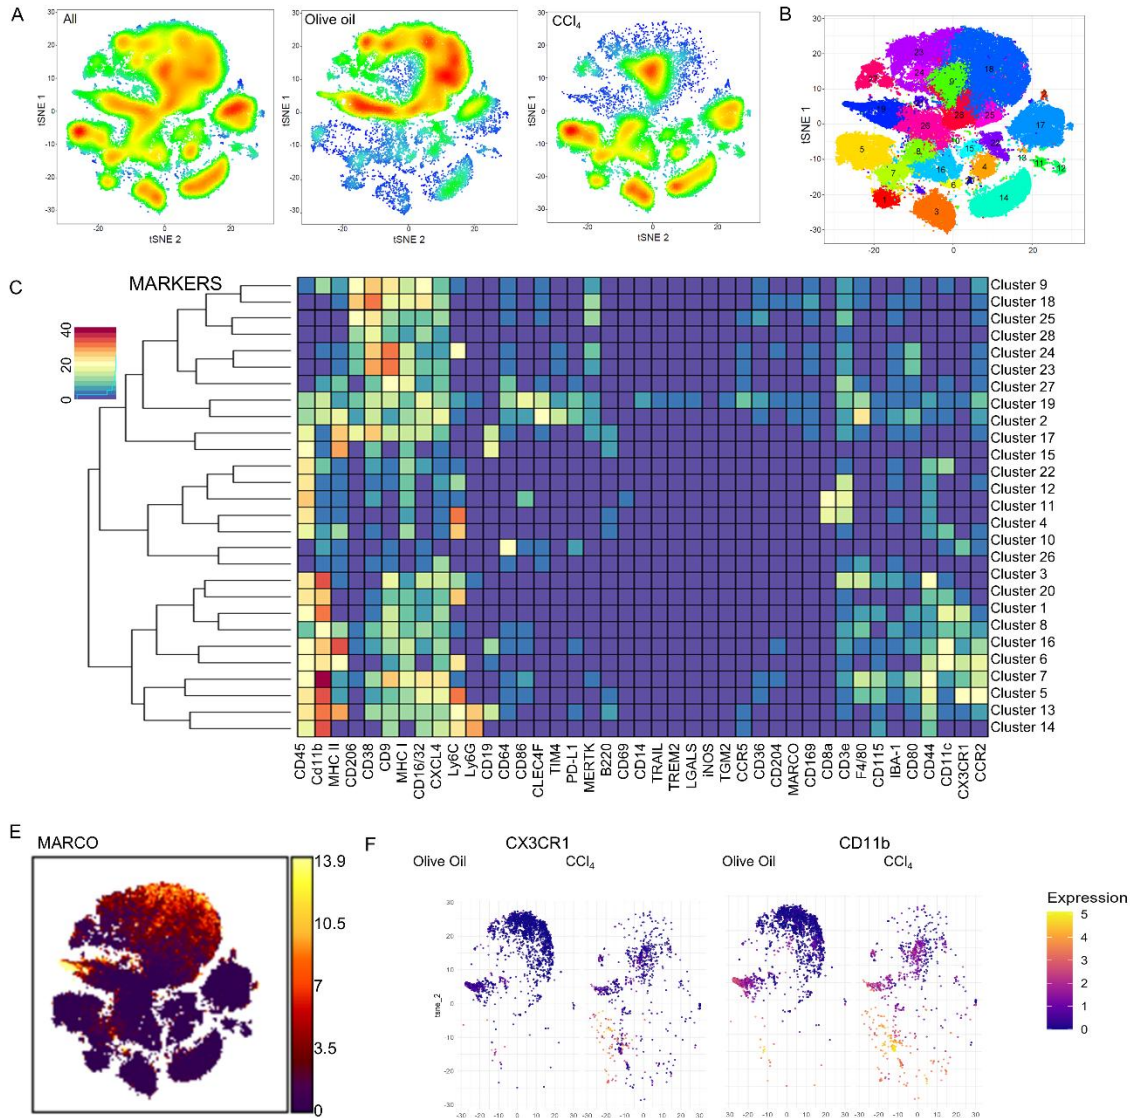

**Supplemental Figure 5. Mass cytometry analysis of intrahepatic leukocytes isolated from control (Olive oil) or fibrotic (CCl<sub>4</sub>) mouse livers.** Cluster heterogeneity changes can be observed in control and fibrotic intrahepatic leukocytes (**A**). A total of 28 individual clusters were identified across all of the samples analyzed (**B**). The marker median distributions across clusters are shown in panel (**C**). MARCO-positive cells are distributed across several main clusters (**D**). Cells were sorted based on MARCO expression, and the top 10% were subset to analyze the expression of infiltrating macrophage markers CX3CR1 (**E**) and CD11b (**F**).

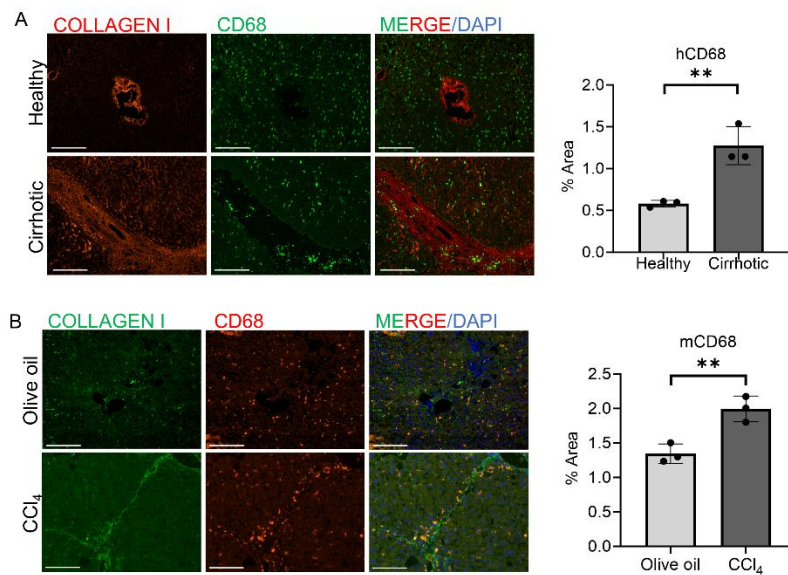

**Supplemental Figure 6. The Macrophage Population Is Increased in the Chronic Fibrotic Liver.** (A) Representative immunofluorescence images of CD68 (macrosialin) staining for macrophages and collagen type I in human liver tissue sections from patients with and without cirrhosis and quantification of CD68 as % of stained area. (B) Representative immunofluorescence images of CD68 and collagen type I in liver tissue sections from mice after olive oil or CCl<sub>4</sub>-administration, quantification of CD68 percentage of stained area. \*\* $P < 0.01$ . Scale bar: 275 $\mu$ m. CCl<sub>4</sub> indicates carbon tetrachloride; CD68, macrosialin; DAPI, 4'6-diamidino-2-phenylindole.

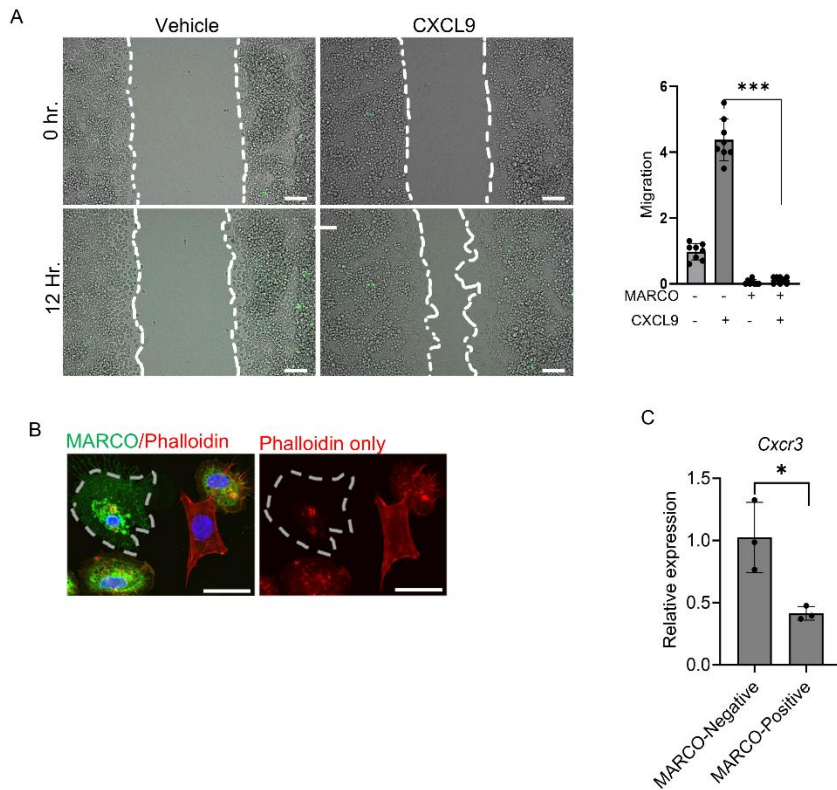

**Supplemental Figure 7. LSEC-Derived CXCL9 Promotes MARCO-Negative Macrophage Migration in vitro through CXCR3.** (A) Representative still images from real-time video microscopy analysis of migrating RAW 264.7 cells overexpressing MARCO (green) versus basal MARCO-negative (clear) after CXCL9-induced chemotaxis for 12 hours. Scale bar = 100  $\mu$ m (B) Representative fluorescence images of MARCO and phalloidin co-staining in RAW 264.7 cells. Scale bar = 10  $\mu$ m. (C) Expression of C-X-C chemokine receptor type 3 (*Cxcr3*) mRNA in MARCO-positive and MARCO-negative macrophages by qPCR. \*\*\* $P$ <0.001, \* $P$ <0.05. CCl<sub>4</sub> indicates carbon tetrachloride; CXCL9, C-X-C motif chemokine 9; DAPI, 4'6-diamidino-2-phenylindole; LSEC, liver sinusoidal endothelial cell; MARCO, macrophage receptor with collagenous structure.

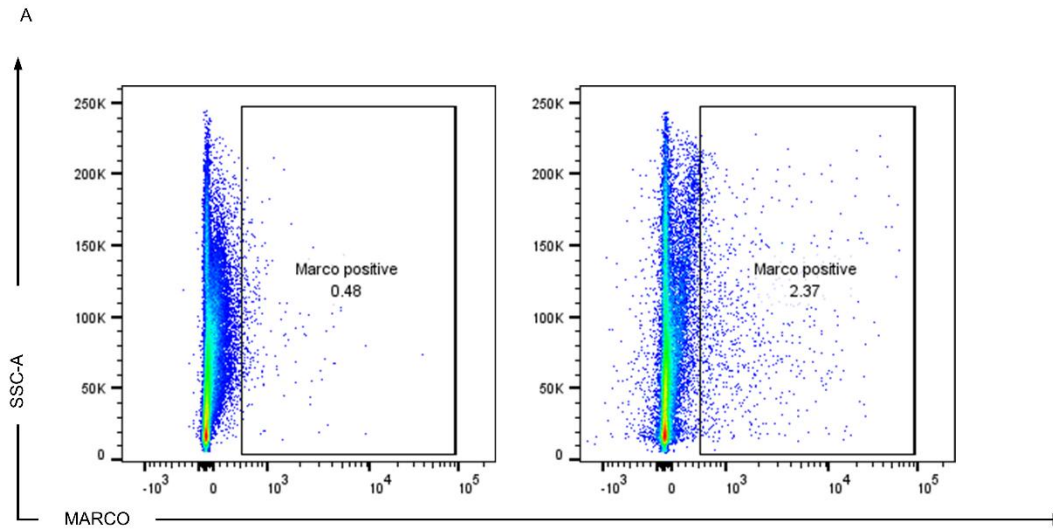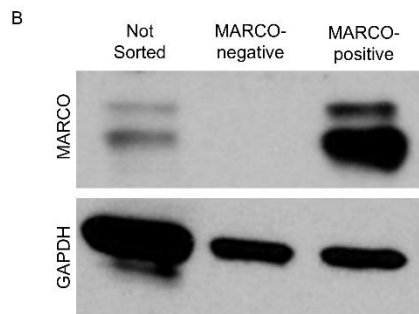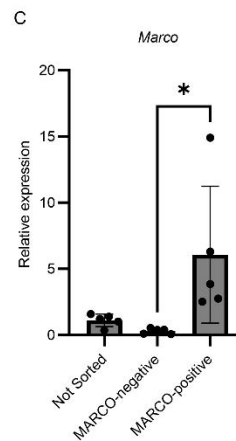

**Supplemental Figure 8. *Marco* expression in intrahepatic macrophages versus induction in BMDM and detection after sorting. (A)** Intrahepatic macrophage isolation from olive oil (left) and CCl<sub>4</sub> (right), followed by flow cytometry sorting to obtain *Marco*-positive cells, yields far too few cells to be useful for translational applications or for in vitro study. To work around this issue, LPS stimulated BMDMs expressing MARCO protein (B) and mRNA (C) were used for Figure 5 in vitro and Figures 6 and 7 in vivo studies.

A

Top Upstream Regulators

Upstream Regulators

| Name               | p-value  | Predicted Activation |
|--------------------|----------|----------------------|
| lipopolysaccharide | 9.29E-97 | Activated            |
| Immunoglobulin     | 5.97E-72 |                      |
| IFNG               | 5.50E-60 |                      |
| NFE2L2             | 3.98E-50 | Activated            |
| CSF1               | 3.64E-47 |                      |

1 2 3 4 5 6 7 8 9 >

B

Top findings from Ingenuity Knowledge Base (show all 51279 categorized literature findings)

Regulates: TNF, IL6, IL1B, NOS2, PTGS2, IL10, CCL2, IL12B, CXCL8, NFkB (complex), TLR4, CCL5, nitric oxide, IFNB1, IFNG

Regulated by: LBP, TLR4, CD14, lipopolysaccharide, LY96, CAMP, ethanol, Casp4, AOA, BPI, Immunoglobulin, TLR, HMGB1, SCARB1, APOA1

Binds: TLR4, CD14, LBP, LY96, TLR2, HMGB1, TLR, HDL, APCS, BPI, CAMP, LTF, hemoglobin, IgG, ITGAM

Role in cell: expression in, production in, phosphorylation in, activation in, activation, response, binding in, apoptosis, degradation in, proliferation

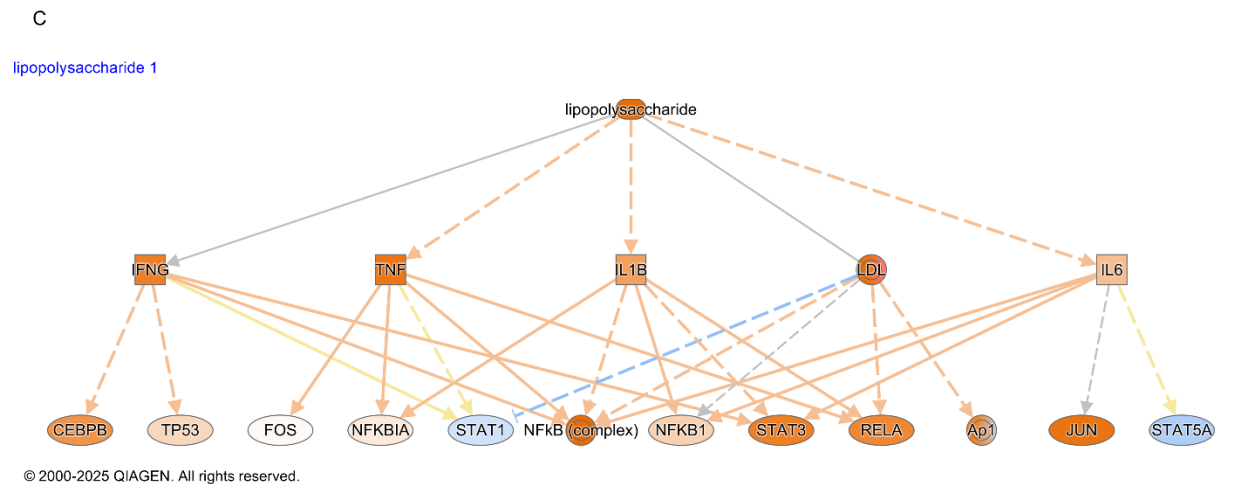

**Supplemental Figure 9. IPA Upstream regulator analysis of *Marco*.** (A) *Marco*-positive macrophages from CCl<sub>4</sub>-induced fibrotic livers reveals LPS as an upstream regulator of *Marco*. This agrees with the literature and practice of using LPS to generate *Marco*-positive BMDM (B) Molecular targets of LPS and LPS signaling per the IPA database. (C) IPA mechanistic network for LPS showing potential intermediate signaling partners responsible for *Marco* induction.

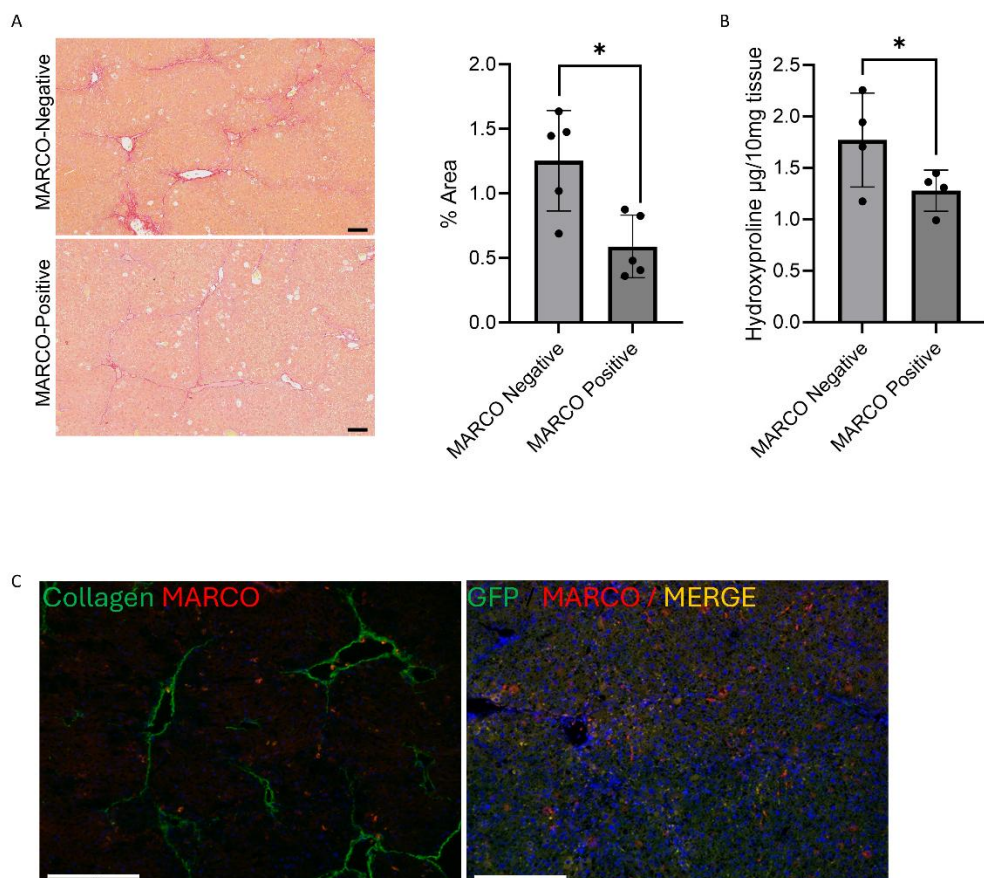

**Supplemental Figure 10. Macrophage Depletion with Clodronate followed by Adoptive Transfer of MARCO-positive macrophages decreases CCl<sub>4</sub> induced fibrosis. (A)** Clodronate containing liposomes were used to deplete endogenous macrophages 48 hours prior to injection with either MARCO-positive or MARCO-negative BMDMs and demonstrate the specific contribution of the transferred BMDMs in the reduction in fibrosis by Picosirius Red staining. Scale bar = 100  $\mu\text{m}$  **(B)** Quantification of Picosirius Red Staining shows a significant decrease in fibrosis with transfer of MARCO-positive macrophages into a clodronate-induced macrophage-depleted background with CCl<sub>4</sub> injury.  $*(P < 0.05)$ . **(C)** Immunofluorescence staining showing collagen I accumulation in a sample of live cells from a mouse with CCl<sub>4</sub>-induced fibrosis treated with MARCO-positive/GFP-positive BMDM. Scale bar = 275  $\mu\text{m}$ .

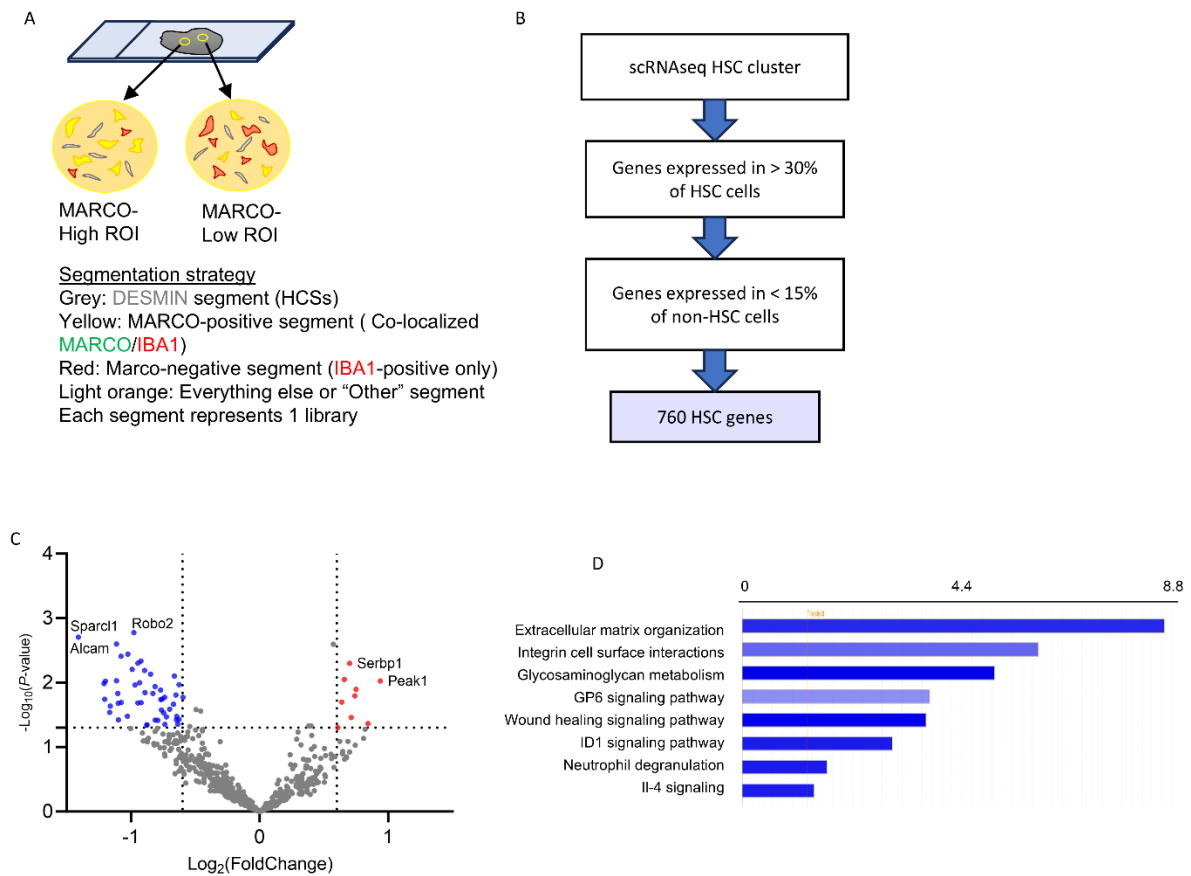

**Supplemental Figure 11. Spatial transcriptomic analysis. (A)** Segmentation strategy. **(B)** Strategy to subset the dataset to focus the analysis on HSC-expressed genes using our scRNAseq data set as reference. **(C)** Volcano plot of HSC differential gene expression in DESMIN-positive MARCO-High versus MARCO-Low areas with CCl<sub>4</sub>-induced fibrosis and no exogenous MARCO-positive BMDM transfer. **(D)** Ingenuity pathway analysis results show dysregulated pathways in HSC from MARCO-High ROIs compared to MARCO-Low ROIs.

## Reference

1. Chen H, Lau MC, Wong MT, Newell EW, Poidinger M, Chen J. Cytokit: A Bioconductor Package for an Integrated Mass Cytometry Data Analysis Pipeline. *PLoS Comput Biol.* Sep 2016;12(9):e1005112. doi:10.1371/journal.pcbi.1005112
